# Supplementary material for: Forecasting of Airborne Conidia Quantities and Potential Insect Associations of Cryphonectria parasitica, the Causal Agent of Chestnut Blight, in England
Source: MDPI journal article supplement (doi:10.3390/jof10030181), 2024-02-28
Supplement: s1 [file s1]

**Supplementary Table S1.** Total number of pooled beetles identified and processed for *Cryphonectria parasitica* real-time.

| Insect species                 | West Sussex | Devon | London | Total |
|--------------------------------|-------------|-------|--------|-------|
| <b>Ambrosia beetles</b>        |             |       |        |       |
| <i>Xylosandrus germanus</i>    | 483         | 3     | 0      | 486   |
| <i>Anisandrus dispar</i>       | 25          | 345   | 24     | 394   |
| <i>Xyleborinus saxesenii</i>   | 4           | 58    | 152    | 214   |
| <i>Xyleborus dryographus</i>   | 0           | 5     | 0      | 5     |
| <i>Trypodendron domesticum</i> | 7           | 73    | 0      | 80    |
| <i>Trypodendron signatum</i>   | 0           | 16    | 0      | 16    |
| <b>Bark beetles</b>            |             |       |        |       |
| <i>Dryocoetes villosus</i>     | 2           | 34    | 0      | 36    |
| <i>Hylesinus wachtli</i>       | 0           | 12    | 0      | 12    |
| <b>Total</b>                   | 521         | 546   | 176    | 1,243 |

**Supplementary Table S2.** Isolated and identified fungal species from alive dry-collected three ambrosia beetle species, one bark beetle, and two hyper parasitic wasps’ species, with indication of the originals or respective dilutions positive culture isolations distribution indicated by black shaded areas. Note: Crushed insects only rendered bacteria that were not identified to species level.

|              |                                     | AMBROSIA BEETLES |                             |    |      |      |       |       |                          |    |      |      |       |       |                             |    |      | BARK BEETLES |       |       |                            |    |      |      |                              | HYMENOPTERA |    |    |      |      |                         |       |    |    |      |      |       |       |
|--------------|-------------------------------------|------------------|-----------------------------|----|------|------|-------|-------|--------------------------|----|------|------|-------|-------|-----------------------------|----|------|--------------|-------|-------|----------------------------|----|------|------|------------------------------|-------------|----|----|------|------|-------------------------|-------|----|----|------|------|-------|-------|
|              |                                     | Acc. No.         | <i>Xylosandrus germanus</i> |    |      |      |       |       | <i>Anisandrus dispar</i> |    |      |      |       |       | <i>Xyleborinus saxeseni</i> |    |      |              |       |       | <i>Dryocoetes villosus</i> |    |      |      | <i>Dryocosmus kuriphilus</i> |             |    |    |      |      | <i>Torymus flavipes</i> |       |    |    |      |      |       |       |
|              |                                     |                  | 1                           | 1  | 1:10 | 1:10 | 1:100 | 1:100 | 1                        | 1  | 1:10 | 1:10 | 1:100 | 1:100 | 1                           | 1  | 1:10 | 1:10         | 1:100 | 1:100 | 1                          | 1  | 1:10 | 1:10 | 1:100                        | 1:100       | 1  | 1  | 1:10 | 1:10 | 1:100                   | 1:100 | 1  | 1  | 1:10 | 1:10 | 1:100 | 1:100 |
| Fungal taxon |                                     |                  | R1                          | R2 | R1   | R2   | R1    | R2    | R1                       | R2 | R1   | R2   | R1    | R2    | R1                          | R2 | R1   | R2           | R1    | R2    | R1                         | R2 | R1   | R2   | R1                           | R2          | R1 | R2 | R1   | R2   | R1                      | R2    | R1 | R2 | R1   | R2   |       |       |
| 1            | <i>Acremonium sclerotigenum</i>     | OK661035         |                             |    |      |      |       |       |                          |    |      |      |       |       |                             |    |      |              |       |       |                            |    |      |      |                              |             |    |    |      |      |                         |       |    |    |      |      |       |       |
| 2            | <i>Alternaria infectoria</i>        | OK661036         |                             |    |      |      |       |       |                          |    |      |      |       |       |                             |    |      |              |       |       |                            |    |      |      |                              |             |    |    |      |      |                         |       |    |    |      |      |       |       |
| 3            | <i>Ambrosiella grossmanniae</i>     | OK661037         |                             |    |      |      |       |       |                          |    |      |      |       |       |                             |    |      |              |       |       |                            |    |      |      |                              |             |    |    |      |      |                         |       |    |    |      |      |       |       |
| 4            | <i>Ambrosiella hartigii</i>         | OK661038         |                             |    |      |      |       |       |                          |    |      |      |       |       |                             |    |      |              |       |       |                            |    |      |      |                              |             |    |    |      |      |                         |       |    |    |      |      |       |       |
| 5            | <i>Aureobasidium pullulans</i>      | OK661039         |                             |    |      |      |       |       |                          |    |      |      |       |       |                             |    |      |              |       |       |                            |    |      |      |                              |             |    |    |      |      |                         |       |    |    |      |      |       |       |
| 6            | <i>Botrytis cinerea</i>             | OK661040         |                             |    |      |      |       |       |                          |    |      |      |       |       |                             |    |      |              |       |       |                            |    |      |      |                              |             |    |    |      |      |                         |       |    |    |      |      |       |       |
| 7            | <i>Cladosporium cf. allicinum</i>   | OK661041         |                             |    |      |      |       |       |                          |    |      |      |       |       |                             |    |      |              |       |       |                            |    |      |      |                              |             |    |    |      |      |                         |       |    |    |      |      |       |       |
| 8            | <i>Cladosporium cladosporioides</i> | OK661042         |                             |    |      |      |       |       |                          |    |      |      |       |       |                             |    |      |              |       |       |                            |    |      |      |                              |             |    |    |      |      |                         |       |    |    |      |      |       |       |
| 9            | <i>Cladosporium cf. sloanii</i>     | OK661043         |                             |    |      |      |       |       |                          |    |      |      |       |       |                             |    |      |              |       |       |                            |    |      |      |                              |             |    |    |      |      |                         |       |    |    |      |      |       |       |
| 10           | <i>Cryptocline actostaphyli</i>     | OK661044         |                             |    |      |      |       |       |                          |    |      |      |       |       |                             |    |      |              |       |       |                            |    |      |      |                              |             |    |    |      |      |                         |       |    |    |      |      |       |       |
| 11           | <i>Daldinia concentrica</i>         | OK661045         |                             |    |      |      |       |       |                          |    |      |      |       |       |                             |    |      |              |       |       |                            |    |      |      |                              |             |    |    |      |      |                         |       |    |    |      |      |       |       |
| 12           | <i>Fusarium avenaceum</i>           | OK661046         |                             |    |      |      |       |       |                          |    |      |      |       |       |                             |    |      |              |       |       |                            |    |      |      |                              |             |    |    |      |      |                         |       |    |    |      |      |       |       |
| 13           | <i>Geosmithia flava</i>             | OK661047         |                             |    |      |      |       |       |                          |    |      |      |       |       |                             |    |      |              |       |       |                            |    |      |      |                              |             |    |    |      |      |                         |       |    |    |      |      |       |       |
| 14           | <i>Gnomoniopsis smithogilvyi</i>    | OK661048         |                             |    |      |      |       |       |                          |    |      |      |       |       |                             |    |      |              |       |       |                            |    |      |      |                              |             |    |    |      |      |                         |       |    |    |      |      |       |       |
| 15           | <i>Haplographium penicillioides</i> | OK661049         |                             |    |      |      |       |       |                          |    |      |      |       |       |                             |    |      |              |       |       |                            |    |      |      |                              |             |    |    |      |      |                         |       |    |    |      |      |       |       |
| 16           | <i>Metapochonia bubillosa</i>       | OK661050         |                             |    |      |      |       |       |                          |    |      |      |       |       |                             |    |      |              |       |       |                            |    |      |      |                              |             |    |    |      |      |                         |       |    |    |      |      |       |       |
| 17           | <i>Mortierella gamsii</i>           | OK661051         |                             |    |      |      |       |       |                          |    |      |      |       |       |                             |    |      |              |       |       |                            |    |      |      |                              |             |    |    |      |      |                         |       |    |    |      |      |       |       |
| 18           | <i>Ophiostoma solheimii</i>         | OK661052         |                             |    |      |      |       |       |                          |    |      |      |       |       |                             |    |      |              |       |       |                            |    |      |      |                              |             |    |    |      |      |                         |       |    |    |      |      |       |       |
| 19           | <i>Paraphacosphaeria neglecta</i>   | OK661053         |                             |    |      |      |       |       |                          |    |      |      |       |       |                             |    |      |              |       |       |                            |    |      |      |                              |             |    |    |      |      |                         |       |    |    |      |      |       |       |
| 20           | <i>Penicillium bialowizense</i>     | OK661054         |                             |    |      |      |       |       |                          |    |      |      |       |       |                             |    |      |              |       |       |                            |    |      |      |                              |             |    |    |      |      |                         |       |    |    |      |      |       |       |
| 21           | <i>Penicillium brevicompactum</i>   | OK661055         |                             |    |      |      |       |       |                          |    |      |      |       |       |                             |    |      |              |       |       |                            |    |      |      |                              |             |    |    |      |      |                         |       |    |    |      |      |       |       |

Supplementary Table S2. Continued.

[illegible]

**Supplementary Table S3.** General correlation analyses between the quantity of trapped spores (estimated either via spore serial dilutions or fragment copy number dilutions) and meteorological parameters. The dark shaded areas indicate significant correlations ( $p < 0.05$ ).

[illegible]
